# Supplementary material
Source: PubMed Central journal article supplement (PMC4611235)
Supplement: hdy201539x1.pdf [file hdy201539x1.pdf]

**Supplementary 1.** Plot of frequency of mosquitoes not genotyped at each SNP marker. Plot shows results prior to filtering markers with <50% of individuals genotyped.

**Supplementary 2.** Frequency (decimal percent) of Log Posterior Density scores >10 from 1000 runs of Bayesian interval mapping, after randomly permuting the phenotype of saltwater-tolerant or susceptible.

**Supplementary 3.** Recombination rate for each chromosome, from 10 Mb sliding windows. Schematics depict positions of chromosome arms, with gray shading at the inversion 2Rop.

**Supplementary 4.** Genomic regions with random forests Variable Importance >0.002 and Bayesian Log Posterior Density >10.

**Supplementary 5.** List of all genes in the six QTL peak regions, with chromosomal locations.

**Supplementary 6.** Separate heatmaps of genotypes for male vs. female saltwater-tolerant and susceptible backcross progeny, showing SNP markers in the six QTL regions. Each row represents an individual mosquito, and each column a marker. Individual panels show (A) tolerant males, (B) susceptible males, (C) tolerant females, and (D) susceptible females. Blue color represents homozygosity for *An. merus*, or hemizyosity for *An. merus* on the X in males.

**Supplementary 7.** Mean ( $\pm 1$  SE) Log Posterior Density for main effect contributions from each marker, from Bayesian interval mapping.

**Supplementary 8.** Mean ( $\pm 1$  SE) Log Posterior Density for epistatic contributions from each marker, from Bayesian interval mapping.

**Supplementary 9.** Mean ( $\pm 1$  SE) Log Posterior Density for gene-sex contributions from each marker, from Bayesian interval mapping.

**Supplementary 10.** List of select genes of interest within the QTL peaks.
